## Strategies for power calculations in predictive biomarker studies in survival data

Dung-Tsa Chen<sup>1</sup>, Po-Yu Huang<sup>2</sup>, Hui-Yi Lin<sup>3</sup>, Eric B. Haura<sup>4</sup>, Scott J. Antonia<sup>4</sup>, W. Douglas Cress<sup>5</sup> and Jhanelle E. Gray<sup>4</sup>

<sup>1</sup> Department of Biostatistics and Bioinformatics, Moffitt Cancer Center & Research Institute, Tampa, FL, USA

<sup>2</sup> Computational Intelligence Technology Center, Industrial Technology Research Institute, Taichung City, Taiwan

<sup>3</sup> Biostatistics program, School of Public Health, Louisiana State University Health Sciences Center, New Orleans, LA, USA

<sup>4</sup> Department of Thoracic Oncology, H. Lee Moffitt Cancer Center & Research Institute, Tampa, FL, USA

<sup>5</sup> Department of Molecular Oncology, H. Lee Moffitt Cancer Center & Research Institute, Tampa, FL, USA

**Correspondence to:** Dung-Tsa Chen, **email:** [Dung-Tsa.Chen@moffitt.org](mailto:Dung-Tsa.Chen@moffitt.org)

**Keywords:** predictive biomarker, precision medicine, prospective study, retrospective study, survival data

**Received:** August 29, 2016

**Accepted:** September 02, 2016

**Published:** September 19, 2016

### ABSTRACT

**Purpose:** Biomarkers and genomic signatures represent potentially predictive tools for precision medicine. Validation of predictive biomarkers in prospective or retrospective studies requires statistical justification of power and sample size. However, the design of these studies is complex and the statistical methods and associated software are limited, especially in survival data. Herein, we address common statistical design issues relevant to these two types of studies and provide guidance and a general template for analysis.

**Methods:** A statistical interaction effect in the Cox proportional hazards model is used to describe predictive biomarkers. The analytic form by Peterson et al. and Lachin is utilized to calculate the statistical power for both prospective and retrospective studies.

**Results:** We demonstrate that the common mistake of using only Hazard Ratio's Ratio (HRR) or two hazard ratios (HRs) can mislead power calculations. We establish that the appropriate parameter settings for prospective studies require median survival time (MST) in 4 subgroups (treatment and control in positive biomarker, treatment and control in negative biomarker). For the retrospective study which has fixed survival time and censored status, we develop a strategy to harmonize the hypothesized parameters and the study cohort. Moreover, we provide an easily-adapted R software application to generate a template of statistical plan for predictive biomarker validation so investigators can easily incorporate into their study proposals.

**Conclusion:** Our study provides guidance and software to help biostatisticians and clinicians design sound clinical studies for testing predictive biomarkers.

### INTRODUCTION

Precision medicine, or personalized medicine, aims to effectively treat patients and prevent disease and is rapidly evolving, as evidenced by recent precision medicine initiatives and the US "Moonshot" ([www.nih.gov/precisionmedicine](http://www.nih.gov/precisionmedicine) and <http://www.cancer.gov/research/key-initiatives/moonshot-cancer-initiative>). In cancer research, various studies have identified potential predictive biomarkers to help physicians determine which treatment will result in the best outcome for a given patient

[1-9]. For example, somatic mutations in the epidermal growth factor receptor (*EGFR*) gene predict which patients with non-small-cell lung carcinoma (NSCLC) will likely respond to gefitinib or erlotinib treatment [1, 3, 9]. For breast cancer, Oncotype DX, a gene signature, provides risk assignments in patients whose disease risk is undetermined by routine clinical variables [8]. In order to claim a predictive biomarker, validation using independent retrospective cohorts and/or prospective clinical trials is necessary [10]. However, such studies require rigorous sample size justification to indicate whether the proposed

**Table 1: Median survival time in each subgroup**

|           |                 | Median survival time (MST)                                                                                                                |                               | Survival probability (S(t))                                                                                                                   |                                |
|-----------|-----------------|-------------------------------------------------------------------------------------------------------------------------------------------|-------------------------------|-----------------------------------------------------------------------------------------------------------------------------------------------|--------------------------------|
|           |                 | TREATMENT                                                                                                                                 |                               | TREATMENT                                                                                                                                     |                                |
|           |                 | no                                                                                                                                        | yes                           | no                                                                                                                                            | yes                            |
| BIOMARKER | low (negative)  | $MST_{(negative, control)}$                                                                                                               | $MST_{(negative, treatment)}$ | $S(t)_{(negative, control)}$                                                                                                                  | $S(t)_{(negative, treatment)}$ |
|           | high (positive) | $MST_{(positive, control)}$                                                                                                               | $MST_{(positive, treatment)}$ | $S(t)_{(positive, control)}$                                                                                                                  | $S(t)_{(positive, treatment)}$ |
|           |                 | $HRR = \frac{MST_{(negative, treatment)} \times MST_{(positive, control)}}{MST_{(negative, control)} \times MST_{(positive, treatment)}}$ |                               | $HRR = \frac{S(t)_{(negative, control)} \times S(t)_{(positive, treatment)}}{S(t)_{(negative, treatment)} \times S(t)_{(positive, control)}}$ |                                |

cohorts have sufficient power. Unfortunately, there is a paucity of literature on this topic due to the complexity of predictive models, especially in survival data [11-19]. From the statistical point of view, predictive models can be translated into the statistical interaction effect model by examining the interaction term to assess the differential treatment effect when the biomarker status changes. For survival data, a few methods based on Cox proportional hazards (PH) model have been used to calculate power and sample size for the interaction effect [11-13, 20]. However, utilization of these methods is not always straightforward due to the complexity of parameter settings.

In this study, we evaluate a series of key issues often ignored in power calculations for the interaction effect in survival data, such as hazard ratio (HR), hazard ratio's ratio (HRR), median survival time (MST), and censoring rate. Since prospective and retrospective studies have different design parameters, these issues are discussed individually.

## RESULTS

Power calculation for validation of predictive biomarker is illustrated in prospective and retrospective studies separately due to different design nature. MST is used for demonstration because of its common use in survival analysis.

### Prospective study

In prospective predictive biomarker validation studies, investigators often consider HRR (often derived from preliminary data) to be a sufficient parameter to calculate power or sample size. Here we highlight the sole use of HRR to calculate statistical power could be misleading. Similarly, the HR of treatment versus control in positive biomarker and the HR in the negative biomarker are insufficient to calculate power. In fact, HRR requires MST in the 4 subgroups (Table 1) in order to appropriately calculate the statistical power. Below are two examples to point out inappropriate calculation if HRR or two HRs are used. We also explain the causes and provide appropriate guidance for the prospective study.

Prior to power calculation, we specify additional

parameters a-b to determine subgroup proportion in Table 2 and c-d to calculate subgroup censoring rate: (a) Ratio of treatment and control = (1:1), (b) Prevalence of the positive biomarker in the control and treatment groups, respectively = (0.5, 0.5), (c) Survival time distribution: Exponential distribution, (d) Censoring time distribution: Uniform distribution with 1 year follow-up and a total study time of 5 years, (e) Total sample size ( $n = 300$ ), and (f) A two-sided 5% type I error.

- Issue of HRR: There are many ways leading to the same HRR. Here we use a HRR of 4/9 as an example with two cases represented by different MSTs in Table 3. In Case 1A, MST is 4 years with treatment and 3 years without treatment in the negative biomarker group. For the positive biomarker group, MST is 3 years and 1 year with and without treatment, respectively. Thus, HR of treatment (compared to control) is 1/3 and 3/4 in the positive and negative biomarker groups, respectively. The corresponding HRR for the interaction effect is  $(1/3)/(3/4) = 4/9$ . In Case 1B, the negative biomarker group has a MST of 2 years with treatment and 1 year without treatment, while the positive biomarker group has a MST of 9 years if treatment is given and 2 years if not. The corresponding HRR for the interaction effect remains 4/9.

With these settings, we are able to calculate power using Equation 1 (Methods Section). We first calculate each subgroup censoring rate by comparing each subgroup MST to the uniform censoring time distribution through Equation 2. Results in Table 3 show that the censoring rate in the 4 subgroups ranges 17%-61% in Case 1A and 17%-80% in Case 1B. By plugging the resulting censoring rates and prevalence of each subgroup in the subgroup factor,  $\sum 1/((1 - c_{i,j}) \times \gamma_{i,j})$  in Equation 1 (i.e., summation of  $1/((1 - \text{censoring rate}) \times \text{proportion of each subgroup})$ ), Case 1A has a smaller subgroup factor of 31.74 compared to 37.7 in Case 1B. As a result, power is higher in Case 1A (71%) than in Case 1B (63%).

Issue of two HRs: Case 1A and 1C have the same HRR of 4/9 and are used for demonstration (Table 3). Case 1C has the same MSTs as Case 1A in the negative biomarker group with and without treatment. But the MSTs are double for Case 1C in the positive biomarker group (2 and 6 years in control and treatment group, respectively). Both cases have the same HRs in negative

**Table 2: Proportion in each subgroup**

|           |                 | TREATMENT                                                                   |                                                                         |
|-----------|-----------------|-----------------------------------------------------------------------------|-------------------------------------------------------------------------|
|           |                 | no                                                                          | yes                                                                     |
| BIOMARKER | low (negative)  | $\gamma_{1,1}=(1-p_{\text{pos treatment}}) \times (1-p_{\text{treatment}})$ | $\gamma_{1,2}=(1-p_{\text{pos treatment}}) \times p_{\text{treatment}}$ |
|           | high (positive) | $\gamma_{2,1}=p_{\text{pos treatment}} \times (1-p_{\text{treatment}})$     | $\gamma_{2,2}=p_{\text{pos treatment}} \times p_{\text{treatment}}$     |

**Table 3: MST and censoring rate of Case 1A-1C**

|                 | Case 1A (HR=4/9) :<br>71% power |       |                                 |     | Case 1B (HR=4/9) :<br>63% power |       |                                 |     | Case 1C (HR=4/9):<br>61% power |       |                                   |     |
|-----------------|---------------------------------|-------|---------------------------------|-----|---------------------------------|-------|---------------------------------|-----|--------------------------------|-------|-----------------------------------|-----|
|                 | MST                             |       | Censoring rate<br>(Overall=45%) |     | MST                             |       | Censoring rate<br>(Overall=43%) |     | MST                            |       | Censoring rate<br>(Overall=55.5%) |     |
|                 | TREATMENT                       |       | TREATMENT                       |     | TREATMENT                       |       | TREATMENT                       |     | TREATMENT                      |       | TREATMENT                         |     |
| BIOMARKER       | no                              | yes   | no                              | yes | no                              | yes   | no                              | yes | no                             | yes   | no                                | yes |
| low (negative)  | 3 yrs                           | 4 yrs | 52%                             | 61% | 1 yr                            | 2 yrs | 17%                             | 38% | 3 yrs                          | 4 yrs | 52%                               | 61% |
| high (positive) | 1 yr                            | 3 yrs | 17%                             | 52% | 2 yrs                           | 9 yrs | 38%                             | 80% | 2 yr                           | 6 yrs | 38%                               | 71% |

and positive biomarker groups (3/4 and 1/3, respectively). The only difference is that MSTs in the positive biomarker group are larger in Case 1C than in Case 1A. This difference leads to a higher subgroup censoring rate in Case 1C (38%-71%) than in Case 1A (17%-61%) in Table 3. Therefore, the power becomes lower in Case 1C (61%) than in Case 1A (71%).

Both examples show an 8-10% power difference and highlight the importance of the two issues (sole use of HRR or two HRs) which could lead to dramatic change of statistical power. This question could be solved by specifying MST in the 4 subgroups (Table 1). The 4 specified subgroup MSTs enable to compete with the censoring time to generate the censoring rate for each subgroup, and therefore to calculate power.

Once the power is calculated, we face another challenge of how to describe the power calculation to justify the sample size. Simply reporting the power and listing the specified parameters, may not sufficiently communicate to readers how the power is computed. Below, we share an easily-adaptable template developed using R software ('PowerPredictiveBiomarker' R package in package installation of Supplementary materials) and we illustrate its functionality using a previously described gene expression signature.

**Data example**

The malignancy-risk (MR) gene signature [21, 22] has been described as a predictive signature that can identify early-stage NSCLC patients most likely to benefit from adjuvant chemotherapy (ACT). For example, in the JBR10 trial [21, 23] (a randomized two-arm trial), the MR signature shows a significant interaction effect ( $p = 0.02$ ) with ACT treatment. Specifically, patients identified

as high-risk by the MR signature tend to survive longer if they received ACT ( $p = 0.03$ ). For low-risk patients, untreated patients had a longer survival but the result is not statistically significantly ( $p = 0.24$ ). The estimated MST is 3.1 and 11.01 years for high-risk patients without and with ACT, respectively. For low-risk patients, the predicted MST is 10.11 and 6.66 years for patients without or with ACT, respectively.

Suppose we plan to validate the MR signature in a prospective study with a total sample size of 200, a ratio of 1:1 of treatment and control, a 50% prevalence of high MR in treatment and control, a 5-year study with 2 years of follow-up, and a two-sided 5% type I error. The statistical plan below provides power for sample size justification (details in Supplementary Figure 1).

Since patients with high MR have MST of 11.01 and 3.1 years in the treatment and control groups, respectively, the corresponding HR is 0.28 (3.1/11.01). In contrast, the HR is 1.52 (10.11/6.66) for patients with the low MR with the MSTs of 6.66 and 10.11 years in the treatment and control groups, respectively. Therefore, HRR of high versus low MR is 0.19 (0.28/1.52). Table 4A summarizes the MST for each subgroup. In addition, the overall MST (combination of the 4 subgroups) is also obtained as 6.98 years accordingly. Similarly, MSTs for the treatment, control, high MR, and low MR groups are 8.56, 5.6, 5.84, 8.21 years, respectively.

We also assume that (1) the percentage of patients in the treatment group is 50%, and (2) the prevalence of high MR is 50% and 50% in the treatment and control groups, respectively. With both assumptions, the subgroup proportion ranges 25% to 25% in Table 4B. The sample size of subgroup is between 50 and 50 (Table 4C).

With a total study time of 5 years with 2 years of follow-up and assumption of uniform distribution for the censoring time, the censoring time follows a uniform

**Table 4: MST, proportion, sample size, and censoring rate for each subgroup in MR signature in a prospective study**

| Power=87% | A:<br>MST (years) |       | B:<br>Subgroup Proportion |      | C:<br>Subgroup Sample Size |     | D:<br>Subgroup Censoring Rate |     |
|-----------|-------------------|-------|---------------------------|------|----------------------------|-----|-------------------------------|-----|
|           | TREATMENT         |       | TREATMENT                 |      | TREATMENT                  |     | TREATMENT                     |     |
| HRR=0.19  | no                | yes   | no                        | yes  | no                         | yes | no                            | yes |
| MR        | no                | yes   | no                        | yes  | no                         | yes | no                            | yes |
| Low       | 10.11             | 6.66  | 0.25                      | 0.25 | 50                         | 50  | 0.79                          | 0.7 |
| High      | 3.10              | 11.01 | 0.25                      | 0.25 | 50                         | 50  | 0.47                          | 0.8 |

**Table 5: MST, proportion, sample size, and censoring rate for each subgroup in MR signature in a retrospective study**

|         | A:<br>MST (years; from preliminary data) |       | B:<br>MST (years; after scaled) |       | C:<br>Subgroup Proportion |      | D:<br>Subgroup Sample Size |     | E:<br>Subgroup Censoring Rate |      |
|---------|------------------------------------------|-------|---------------------------------|-------|---------------------------|------|----------------------------|-----|-------------------------------|------|
|         | TREATMENT                                |       | TREATMENT                       |       | TREATMENT                 |      | TREATMENT                  |     | TREATMENT                     |      |
| MR      | no                                       | yes   | no                              | yes   | no                        | yes  | no                         | yes | no                            | yes  |
| Low     | 10.11                                    | 6.66  | 8.69                            | 6.06  | 0.26                      | 0.24 | 35                         | 32  | 0.41                          | 0.70 |
| High    | 3.10                                     | 11.01 | 2.67                            | 10.02 | 0.26                      | 0.24 | 35                         | 32  | 0.69                          | 0.58 |
| Overall | 5.6                                      | 8.56  | 4.82                            | 7.80  |                           |      |                            |     |                               |      |

distribution between 2 and 5 years. By comparing with MST in Table 4A (assuming exponential distribution for survival time), censoring rates for the 4 subgroups range from 0.47 to 0.8 through Equation 2 (Table 4D).

By taking all together for consideration with a two-sided 5% type I error, the sample size of 200 will have an 87% power to detect a HRR of 0.19.

### Retrospective study

Prospective study requires accrual time and follow-up time to construct a censoring time. Uniform distribution is a good choice in this case. With given MST in each subgroup to form HRR, overall and subgroup censoring rate could be computed by Equation 2. In contrast, retrospective study often has observed survival time and censored status collected. Thus overall MST and censoring rate are already determined. If survival time and censored status are also available to treatment and control groups, we will know the corresponding MSTs and censoring rates. So, accrual time and follow-up time become irrelevant for the retrospective study. Since the retrospective study has this unique property, we consider a strategy to have hypothesized parameters more realistically reflecting to the study cohort.

Our strategy: Suppose the biomarker of interest has demonstrated potential clinical relevance in preliminary data with estimated MSTs in the 4 subgroups (Table 1) and the corresponding HRR (effect size). We plan to validate the biomarker in a retrospective study. Two key issues need to be addressed: (a) how to specify MSTs in the 4 subgroups such that the overall MST is comparable to the study cohort (or comparable MSTs between the preliminary data and study cohort in the treatment and control groups if the MST is available for the treatment and control in the study cohort) and (b) how to build

an appropriate censoring time distribution such that the overall censoring rate is comparable to the study cohort (or comparable censoring rate between the preliminary data and study cohort in the treatment and control groups if the censoring rate is available for the treatment and control in the study cohort). In short, the key to the two issues is how to make the hypothesized settings comparable to the study cohort.

To generate a comparable overall MST, we consider an approach that employs a common factor,  $k$ , to all 4 subgroup MSTs such that the overall MST is the same to the study cohort through Equation 4. A similar formula (Equation 5) for the factor,  $k_g$ , ( $g = 1$  and  $2$  for the control and treatment, respectively) could be applied to treatment and control groups if both MSTs are available in the study cohort. Thus, by providing overall MST of the study cohort (or MSTs for treatment and control), we are able to scale the 4 subgroup MSTs of the preliminary data to generate a matched overall MST (or matched MSTs for treatment and control).

To determine a matched overall censoring rate, we use exponential distribution for censoring time because the observed survival time in retrospective study is variable in contrast to prospective study which uses the uniform distribution for a fixed maximum of study time. With the property of exponential distribution in both survival and censoring time, we can identify appropriate overall censoring time distribution or censoring time distribution for treatment and control through Equation 6-7. Once the censoring time distribution is determined, we are able to calculate censoring rate for each subgroup. With the specified HRR and prevalence of each subgroup, the power can be easily calculated through Equation 1.



## Data example (MR continued; Supplementary Figure 2)

Suppose we also plan to validate the MR signature by utilizing archived tissue samples from a retrospective study, a phase III, randomized three-arm clinical trial, neo-adjuvant taxol/carboplatin hope (NATCH) [24]. For this study, we focus on two arms, control arm and ACT arm, with OS as the primary outcome. The control arm has 141 patients with a 55% censoring rate and a MST of 4.8 years while there are 129 patients in the ACT arm with a censoring rate of 64% and a MST of 7.8 years. We expect that 50% of the tissue samples ( $n = (141+129)/2 = 135$ ) are available and would like to know if this sample size has sufficient power to test the effect size (HRR = 0.19) for the signature validation.

We first compare MST of the treatment (and control) between the preliminary data and the study cohort. Results show that for the treatment group, the preliminary data had a higher MST than the study cohort (8.56 versus 7.8 years; Table 5A for MST from preliminary data). For the control group, the preliminary data had a higher MST than the study cohort (5.6 versus 4.8 years; Table 5A). To make both data comparable, we use Equation 5 for the factor,  $k_g$ , to rescale the preliminary data (Table 5B for scaled MST). Since the formula need the proportion of each subgroup, we assume a 50% prevalence of positive biomarker in both treatment and control groups. Combined with 48% patients in the treatment group, the subgroup proportion ranges 24% to 26% with the sample size between 32 and 35 (Table 5C-D for proportion and sample size). By plugging the subgroup proportions in the formula, the resulting scale factor becomes 0.91 and 0.86 for the treatment and control, respectively. The rescaled data show that MSTs in treatment and control match well to the ones in the study cohort while retaining the same HRR.

The next step is to identify the censoring time distribution for the treatment and control groups in order to match the censoring rate to the study cohort. With the fixed censoring rate in the study cohort (64% and 55% for the treatment and control, respectively), subgroup scaled MST, and subgroup proportion (Table 5B-C), Equation 7 yields exponential censoring time distribution with MST 13.98 and 5.99 years for the treatment and control groups, respectively. As a result, censoring rate of each subgroup ranges from 0.41 to 0.70 in Table 5E by Equation 3.

Therefore, by taking all together for consideration (censoring rate and proportion for each subgroup) with a two-sided 5% type I error, the sample size of 135 will have 85% power to detect a HRR of 0.19 by Equation 1.

## DISCUSSION

Predictive biomarkers are potentially powerful tools for precision medicine. However, development of

predictive biomarker requires prospective or retrospective studies for validation and solid statistical plans to justify sample size. Unfortunately, these studies have complex designs and the statistical methods and associated software are limited. In this study, we clarify common misconceptions in sole use of HRR and HRs, explain key parameters, and provide an easily-adapted statistical plan template for study design and power calculations. We highlight important differences between retrospective and prospective studies and our strategy to mimic study cohorts for proper power calculations.

In particular, for prospective studies, we highlight the need for MST in the 4 subgroups of Table 1. The use of only HRR or two HRs could mislead the power. Proper power calculation also requires enrollment time and follow-up time to define the censoring time in order to determine the censoring rate. In addition, we have to provide the prevalence of positive biomarker for treatment and control groups along with the ratio of treatment and control to determine the subgroup proportion. Once these parameters are well defined, power can be calculated for a given sample size and type I error through Equation 1. More importantly, based on our collaborative research experiences, we provide a template of statistical plan to detail derivation of censoring rate, proportion, and sample size for each subgroup, and therefore power calculation. To make the template accessible, we have developed a R software application ('PowerPredictiveBiomarker' R package) for the biomedical community.

For the retrospective study, we point out its distinct design which requires special treatment to generate appropriate power. Specifically, the retrospective study has fixed survival time and censored status (i.e., survival data have been collected). This feature challenges the hypothesized parameters. For example, suppose the preliminary data for discovering the biomarker has an overall MST of 6 years, but the study cohort you plan to validate has an overall MST of 2 years. Then both studies have a different overall MST. As a result, direct plugin of the preliminary results into the study cohort becomes problematic. Our strategy provides an approach to harmonize both studies such that their MSTs and censoring rates are comparable. Like the prospective study, the 'PowerPredictiveBiomarker' R package generates a template of statistical plan so investigators could easily incorporate into their retrospective study proposal. Example data from the published MR signature gives a hand-on experience for end-user to prepare the statistical plan for predictive biomarker validation.

In summary, power calculation for predictive biomarker in survival data requires well thought out parameter settings. Our study provides guidance and software to help biostatisticians and clinicians conduct power calculation in order to design a scientifically solid validation cohort for testing predictive biomarker.

## MATERIALS AND METHODS

Interaction effect model for survival data: An interaction effect model is described below based on the Cox PH model. The model includes a biomarker variable (positive and negative) and a treatment variable (treatment and control), and the interaction term of the two variables as expressed in the Cox PH model:

$$h(t) = h_0(t) \times e^{\beta_1 \times \text{biomarker} + \beta_2 \times \text{treatment} + \beta_3 \times \text{biomarker} \times \text{treatment}}$$

where  $h(t)$  is a hazard of event at time  $t$  and  $h_0(t)$  is the baseline hazard.

This model involves three parameters,  $\beta_1$ ,  $\beta_2$ , and  $\beta_3$ :  $\beta_1$  represents the biomarker effect. A positive value of  $\beta_1$  indicates shorter survival for those with a positive biomarker than the ones with a negative biomarker.

$\beta_2$  represents the treatment effect. A negative value of  $\beta_2$  indicates survival improved in treated patients compared to untreated patients.

$\beta_3$  represents the interaction effect between biomarker and treatment, a differential treatment effect when the biomarker value changes.

The parameter of interest for a predictive biomarker is the interaction term,  $\beta_3$ .  $\beta_3$  can be expressed as  $\log(\text{HRR})$  where HRR is the abbreviation of Hazard Ratio's Ratio (i.e., hazard ratio (HR) in positive biomarker/HR in negative biomarker). Power calculation for the interaction model includes two methods by Peterson et al. [11] and Lachin [20].

Formula of power calculation by Peterson et al. and Lachin [11, 20] methods: Both methods have a similar analytic form of power function to estimate the interaction effect,  $\beta_3$ , with the formula below

$$\text{Power}_{(\text{Peterson or Lachin})} = \Phi \left( -Z_{1-\alpha/2} + \sqrt{\frac{N \times \log(\text{HRR})^2}{\sum 1/((1 - c_{ij}) \times Y_{ij})}} \right) \quad (\text{Eq.1})$$

Where HRR could be expressed as  $\exp(\beta_3)$ ,  $\Phi$  is a cumulative normal distribution,  $Z$  is the normal quantile at  $1-\alpha/2$  level,  $N$  is the total sample size,  $c_{ij}$  is the censoring rate and  $y_{ij}$  is the proportion for subgroup  $i, j$  with  $i = 1$  and  $2$  for negative and positive biomarker, respectively, and with  $j = 1$  and  $2$  for control and treatment group, respectively.

Prospective and retrospective study for predictive biomarker validation: The prospective study we consider for the application is the biomarker stratified design which patients within each biomarker subgroup are randomly assigned to treatment or control groups [25-27]. One successful example is the 'Marker Validation of Erlotinib in Lung Cancer' (MARVEL) trial using EGFR gene to stratify patients and then randomly assign patients with erlotinib or pemetrexed (ClinicalTrials.gov ID: NCT00738881). The other potential design is a prospective observational trial which biomarker status is measured for

each patient, but not used for treatment assignment, such as 'A multi-center prospective observational biomarker study on egfr+ non-small cell lung cancer patients with leptomeningeal metastasis' (ClinicalTrials.gov ID: NCT02803619). In short, both designs allow us to validate if the biomarker is predictive to treatment in a prospective way. For the retrospective study, our focus is a study that could utilize achieved tissue samples from a randomized clinical trial (RCT). For example, JBR10, a complete RCT to evaluate chemotherapy, has been utilized to validating various gene signatures in NSCLC [21, 23, 28]. Another example is 'Alliance for Clinical Trials in Oncology' which allow biospecimen request from various complete RCTs.

Challenges: While the analytic form in Equation 1 is attractive, it has issues of how to get HRR for the predictive effect size, how to compute  $c_{ij}$  for the censoring rate, and how to calculate  $y_{ij}$  for the subgroup proportion. For retrospective study, other unique issues are how to hypothesize MSTs in the 4 subgroups of Table 1 and how to identify appropriate censoring time distribution to better fit the study cohort. Below we provide guidance to address these problems.

HRR: By definition, HRR is a ratio of two hazard ratios between the positive and negative biomarker (negative biomarker as reference) where the hazard ratio is referred to the comparison of hazard rate ( $\lambda$ ) between treatment and control (control as reference). Thus, HRR is composed of four subgroups (treatment and control in positive biomarker, treatment and control in negative biomarker; Table 1) and has the form,  $(\lambda_{(\text{negative, treatment})} \times \lambda_{(\text{positive, control})}) / (\lambda_{(\text{negative, control})} \times \lambda_{(\text{positive, treatment})})$ . While it is not straightforward to get the hazard rate, we find out two useful surrogates: median survival time (MST) and survival probability at a specific time point ( $S(t)$ ). Both are summary statistics commonly used in survival analysis. With the assumption of exponential distribution for survival time, these summary statistics are exchangeable with the hazard rate,  $\lambda$ , under the following formula:

$$\lambda = \frac{\log(2)}{\text{MST}} = \frac{-\log(S(t))}{t}$$

Therefore, HRR can be based upon MST or  $S(t)$  in the four subgroups of Table 1 (i.e.,  $\text{HRR} = (\text{MST}_{(\text{negative, treatment})} \times \text{MST}_{(\text{positive, control})}) / (\text{MST}_{(\text{negative, control})} \times \text{MST}_{(\text{positive, treatment})})$  or  $(S(t)_{(\text{negative, control})} \times S(t)_{(\text{positive, treatment})}) / (S(t)_{(\text{negative, treatment})} \times S(t)_{(\text{positive, control})})$ ).

Censoring rate: Since the analytic form (Equation 1) requires subgroup censoring rate ( $c_{ij}$ ) and an overall censoring rate ( $c$ ), the following equation' is used to calculate the censoring rate.

$$c_{ij} = P(C < T_{ij}) = 1 - P(C > T_{ij}) = 1 - \int_0^{\infty} P(T_{ij} \leq t) f_c(t) dt$$

$$c = 1 - \sum [Y_{ij} \times \int_0^{\infty} P(T_{ij} \leq t) f_c(t) dt]$$

where  $T_{ij}$  is the survival time of subgroup  $(i,j)$  ( $i = 1$  and  $2$  for negative and positive biomarker, respectively, and with  $j = 1$  and  $2$  for control and treatment group), and

C is the censoring time with a density function,  $f_c(t)$ .

When  $T_{i,j}$  follows an exponential distribution with  $\lambda_{(i,j)}$  or  $MST_{(i,j)}$ , the subgroup censoring rate ( $c_{i,j}$ ) could be simplified for a uniform censoring time or an exponential censoring time.

$$c_{i,j} = \frac{1}{(b-a) \times \lambda_{i,j}} (e^{-a\lambda_{i,j}} - e^{-b\lambda_{i,j}})$$

$$= \frac{1}{(b-a) \times \log(2)/MST_{i,j}} (e^{-a \times \log(2)/MST_{i,j}} - e^{-b \times \log(2)/MST_{i,j}})$$

for a uniform censoring time with two parameters: a and b as the corresponding lower and upper boundary. (Eq. 2)

$$c_{i,j} = \frac{\lambda_{i,j}}{(\lambda_{i,j} + \lambda_c)} = \frac{\frac{1}{MST_{i,j}}}{\left(\frac{1}{MST_{i,j}} + \frac{1}{MST_c}\right)}$$

for an exponential censoring time with  $\lambda_c$  or  $MST_c$ . (Eq. 3)

Subgroup proportion: Calculation of  $\gamma_{i,j}$  could be through the prevalence of positive biomarker in the treatment group ( $p_{(\text{pos}|\text{treatment})}$ ) and in the control group ( $p_{(\text{pos}|\text{control})}$ ) and the proportion of patients receiving treatment ( $p_{(\text{treatment})}$ ) (Table 2). Specifically, the proportion of control group is  $\gamma_{1,1} = (1 - p_{(\text{pos}|\text{treatment})}) \times (1 - p_{(\text{treatment})})$  for the negative biomarker and  $\gamma_{2,1} = p_{(\text{pos}|\text{treatment})} \times (1 - p_{(\text{treatment})})$  for the positive biomarker. Similarly, the proportion of negative biomarker in the treatment group is  $\gamma_{1,2} = (1 - p_{(\text{pos}|\text{treatment})}) \times p_{(\text{treatment})}$ . For the positive biomarker, the proportion is  $\gamma_{2,2} = p_{(\text{pos}|\text{treatment})} \times p_{(\text{treatment})}$ .

Comparable overall MST: One key issue in retrospective study is how to hypothesize MSTs in the 4 subgroups of Table 1 such that the overall MST is comparable to the study cohort. Our approach is to find a common factor,  $k$ , such that the weighted summation (subgroup proportion as weight) equates to 0.5 (definition of MST) by the formula:

$$\lambda_0 \sum_{i=1}^2 \sum_{j=1}^2 \frac{\gamma_{i,j}}{\left(\lambda_0 + \frac{\lambda_{i,j}}{k}\right)} = 0.5 \text{ or}$$

$$\frac{1}{MST_0} \sum_{i=1}^2 \sum_{j=1}^2 \frac{\gamma_{i,j}}{\left(\frac{1}{MST_0} + \frac{1}{k \times MST_{i,j}}\right)} = 0.5$$

(Eq. 4)

where  $\lambda_{i,j} = \log(2)/MST_{(i,j)}$  is the hazard rate and  $\gamma_{i,j}$  is the prevalence for the subgroup (i,j), and  $\lambda_0$  and  $MST_0$  are the overall hazard rate and overall MST, respectively, for the study cohort. The approach ensures the rescaled 4 subgroup MSTs have the same overall MST to the study cohort. Derivation of the formula is based on Equation 3. With the assumption of exponential distribution for two survival time distributions, we are able to compare

each subgroup distribution with the overall distribution of the study cohort. Then with the common factor,  $k$ , the weighted summation over the 4 subgroups yields Equation 4.

A similar formula for the factor,  $k_g$ , ( $g = 1$  and  $2$  for the control and treatment, respectively) could be applied to treatment and control groups if both MSTs are available in the study cohort:

$$\lambda_{0,g} \sum_{i=1}^2 \frac{\gamma_{i,g}/(\gamma_{1,g} + \gamma_{2,g})}{\left(\lambda_{0,g} + \frac{\lambda_{i,g}}{k_g}\right)} = 0.5 \text{ or}$$

$$\frac{1}{MST_{0,g}} \sum_{i=1}^2 \frac{\gamma_{i,g}/(\gamma_{1,g} + \gamma_{2,g})}{\left(\frac{1}{MST_{0,g}} + \frac{1}{k_g \times MST_{i,g}}\right)} = 0.5$$

(Eq. 5)

where  $\lambda_{i,g} = \log(2)/MST_{(i,g)}$  is the hazard rate of the subgroup (i,g) ( $i = 1$  and  $2$  for positive and negative biomarker, respectively) in the treatment or control groups, and  $\gamma_{i,g}$  is the corresponding prevalence.  $\lambda_{0,g}$  and  $MST_{0,g}$  are the hazard rate and MST, respectively, for the control ( $g = 1$ ) and the treatment ( $g = 2$ ) in the study cohort.

Censoring time distribution for the retrospective study: Another key issue in retrospective study is to select an appropriate censoring time distribution such that the overall censoring rate is comparable to the study cohort. With the property of exponential distribution in both survival and censoring time through Equation 3, distribution of the overall censoring time can be identified through the formula:

$$\lambda_c \sum_{i=1}^2 \sum_{j=1}^2 \frac{\gamma_{i,j}}{(\lambda_c + \lambda_{i,j})} = 1 - c \text{ or}$$

$$\frac{1}{MST_c} \sum_{i=1}^2 \sum_{j=1}^2 \frac{\gamma_{i,j}}{\left(\frac{1}{MST_c} + \frac{1}{MST_{i,j}}\right)} = 1 - c$$

(Eq. 6)

where  $\lambda_c$  and  $MST_c$  are the hazard rate and MST, respectively, for the overall censoring time and  $c$  is the overall censoring rate. Similarly, the formula of censoring time distribution for the treatment and control is

$$\lambda_{c,g} \sum_{i=1}^2 \frac{\gamma_{i,g}/(\gamma_{1,g} + \gamma_{2,g})}{(\lambda_{c,g} + \lambda_{i,g})} = 1 - c_g \text{ or}$$

$$\frac{1}{MST_{c,g}} \sum_{i=1}^2 \frac{\gamma_{i,g}/(\gamma_{1,g} + \gamma_{2,g})}{\left(\frac{1}{MST_{c,g}} + \frac{1}{MST_{i,g}}\right)} = 1 - c_g$$

(Eq. 7)

where  $\lambda_{c,g}$  and  $MST_{c,g}$  are the hazard rate and MST, respectively, of the censoring time and  $c_g$  is the censoring rate for control ( $g = 1$ ) and treatment ( $g = 2$ ).

## CONFLICTS OF INTEREST

None.

## GRANT SUPPORT

The study was supported in part by Department of Biostatistics and Bioinformatics at the H. Lee Moffitt Cancer Center & Research Institute, James and Esther King Biomedical Research Program Grant (5JK06) from the Florida Department of Health, the National Institutes of Health (5P30CA076292), Taiwan National Science Council (NSC 101-2118-M-005-002), and Taiwan Graduate Students Study Abroad Program.

## Editorial note

This paper has been accepted based in part on peer-review conducted by another journal and the authors' response and revisions as well as expedited peer-review in *Oncotarget*.

## REFERENCES

1. Rosell R, Viteri S, Molina MA, Benlloch S and Taron M. Epidermal growth factor receptor tyrosine kinase inhibitors as first-line treatment in advanced nonsmall-cell lung cancer. *Current opinion in oncology*. 2010; 22(2):112-120.
2. Jordan VC. Tamoxifen: a most unlikely pioneering medicine. *Nature reviews Drug discovery*. 2003; 2(3):205-213.
3. Kobayashi K and Hagiwara K. Epidermal growth factor receptor (EGFR) mutation and personalized therapy in advanced nonsmall cell lung cancer (NSCLC). *Targeted oncology*. 2013; 8(1):27-33.
4. Choi YL, Soda M, Yamashita Y, Ueno T, Takashima J, Nakajima T, Yatabe Y, Takeuchi K, Hamada T, Haruta H, Ishikawa Y, Kimura H, Mitsudomi T, Tanio Y, Mano H and Group ALKLCS. EML4-ALK mutations in lung cancer that confer resistance to ALK inhibitors. *N Engl J Med*. 2010; 363(18):1734-1739.
5. Flaherty KT, Puzanov I, Kim KB, Ribas A, McArthur GA, Sosman JA, O'Dwyer PJ, Lee RJ, Grippo JF, Nolop K and Chapman PB. Inhibition of mutated, activated BRAF in metastatic melanoma. *N Engl J Med*. 2010; 363(9):809-819.
6. Lancashire LJ, Powe DG, Reis-Filho JS, Rakha E, Lemetre C, Weigelt B, Abdel-Fatah TM, Green AR, Mukta R, Blamey R, Paish EC, Rees RC, Ellis IO and Ball GR. A validated gene expression profile for detecting clinical outcome in breast cancer using artificial neural networks. *Breast Cancer Res Treat*. 2010; 120(1):83-93.
7. Cardoso F, Van't Veer L, Rutgers E, Loi S, Mook S and Piccart-Gebhart MJ. Clinical application of the 70-gene profile: the MINDACT trial. *J Clin Oncol*. 2008; 26(5):729-735.
8. Kelly CM, Krishnamurthy S, Bianchini G, Litton JK, Gonzalez-Angulo AM, Hortobagyi GN and Pusztai L. Utility of oncotype DX risk estimates in clinically intermediate risk hormone receptor-positive, HER2-normal, grade II, lymph node-negative breast cancers. *Cancer*. 2010; 116(22):5161-5167.
9. Maemondo M, Inoue A, Kobayashi K, Sugawara S, Oizumi S, Isoke H, Gemma A, Harada M, Yoshizawa H, Kinoshita I, Fujita Y, Okinaga S, Hirano H, Yoshimori K, Harada T, Ogura T, et al. Gefitinib or chemotherapy for non-small-cell lung cancer with mutated EGFR. *N Engl J Med*. 2010; 362(25):2380-2388.
10. IOM (Institute of Medicine): *Evolution of Translational Omics: Lessons Learned and the Path Forward*. (Washington, DC: The National Academies Press). 2012.
11. Peterson B and George SL. Sample size requirements and length of study for testing interaction in a 2 x k factorial design when time-to-failure is the outcome [corrected]. *Controlled clinical trials*. 1993; 14(6):511-522.
12. Xiang AH, Sather HN and Azen SP. Power considerations for testing an interaction in a 2 x k factorial design with a failure time outcome. *Controlled clinical trials*. 1994; 15(6):489-502.
13. Schmoor C, Sauerbrei W and Schumacher M. Sample size considerations for the evaluation of prognostic factors in survival analysis. *Stat Med*. 2000; 19(4):441-452.
14. Clark GM. Prognostic factors versus predictive factors: Examples from a clinical trial of erlotinib. *Mol Oncol*. 2008; 1(4):406-412.
15. Mandrekar SJ and Sargent DJ. Clinical trial designs for predictive biomarker validation: theoretical considerations and practical challenges. *J Clin Oncol*. 2009; 27(24):4027-4034.
16. Simon R. Clinical trial designs for evaluating the medical utility of prognostic and predictive biomarkers in oncology. *Personalized medicine*. 2010; 7(1):33-47.
17. Mandrekar SJ and Sargent DJ. Predictive biomarker validation in practice: lessons from real trials. *Clinical trials*. 2010; 7(5):567-573.
18. Van Schaeckbroeck S, Allen WL, Turkington RC and Johnston PG. Implementing prognostic and predictive biomarkers in CRC clinical trials. *Nat Rev Clin Oncol*. 2011; 8(4):222-232.
19. Shi Q, Mandrekar SJ and Sargent DJ. Predictive biomarkers in colorectal cancer: usage, validation, and design in clinical trials. *Scandinavian journal of gastroenterology*. 2012; 47(3):356-362.
20. Lachin JM. Sample size and power for a logrank test and Cox proportional hazards model with multiple groups and strata, or a quantitative covariate with multiple strata. *Stat Med*. 2013; 32(25):4413-4425.



21. Chen DT, Hsu YL, Fulp WJ, Coppola D, Haura EB, Yeatman TJ and Cress WD. Prognostic and predictive value of a malignancy-risk gene signature in early-stage non-small cell lung cancer. *J Natl Cancer Inst.* 2011; 103(24):1859-1870.
22. Chen DT, Nasir A, Culhane A, Venkataramu C, Fulp W, Rubio R, Wang T, Agrawal D, McCarthy SM, Gruidl M, Bloom G, Anderson T, White J, Quackenbush J and Yeatman T. Proliferative genes dominate malignancy-risk gene signature in histologically-normal breast tissue. *Breast cancer research and treatment.* 2010; 119(2):335-346.
23. Zhu CQ, Ding K, Strumpf D, Weir BA, Meyerson M, Pennell N, Thomas RK, Naoki K, Ladd-Acosta C, Liu N, Pintilie M, Der S, Seymour L, Jurisica I, Shepherd FA and Tsao MS. Prognostic and predictive gene signature for adjuvant chemotherapy in resected non-small-cell lung cancer. *Journal of clinical oncology.* 2010; 28(29):4417-4424.
24. Felip E, Rosell R, Maestre JA, Rodriguez-Paniagua JM, Moran T, Astudillo J, Alonso G, Borro JM, Gonzalez-Larriba JL, Torres A, Camps C, Guijarro R, Isla D, Aguiló R, Alberola V, Padilla J, et al. Preoperative chemotherapy plus surgery versus surgery plus adjuvant chemotherapy versus surgery alone in early-stage non-small-cell lung cancer. *J Clin Oncol.* 2010; 28(19):3138-3145.
25. Sargent DJ, Conley BA, Allegra C and Collette L. Clinical trial designs for predictive marker validation in cancer treatment trials. *J Clin Oncol.* 2005; 23(9):2020-2027.
26. Simon R. The use of genomics in clinical trial design. *Clin Cancer Res.* 2008; 14(19):5984-5993.
27. Freidlin B, McShane LM and Korn EL. Randomized clinical trials with biomarkers: design issues. *J Natl Cancer Inst.* 2010; 102(3):152-160.
28. Tang H, Xiao G, Behrens C, Schiller J, Allen J, Chow CW, Suraokar M, Corvalan A, Mao J, White MA, Wistuba, II, Minna JD and Xie Y. A 12-gene set predicts survival benefits from adjuvant chemotherapy in non-small cell lung cancer patients. *Clin Cancer Res.* 2013; 19(6):1577-1586.
