# Supplementary material for: Strategies for power calculations in predictive biomarker studies in survival data
Source: PubMed Central journal article supplement (PMC5348326; doi:10.18632/oncotarget.12124), 2016-09-19
Supplement: oncotarget-07-80373-s001.pdf [file oncotarget-07-80373-s001.pdf]

# Strategies for power calculations in predictive biomarker studies in survival data

## Supplementary Materials

[Instruction of 'PowerPredictiveBiomarker' R package.](#)

[Supplementary Figure 1 for prospective study:](#) (A) parameter settings, (B) result output in MR signature, and (C) statistical plan.

[Supplementary Figure 2 for retrospective study:](#) (A) parameter settings, (B) result output in MR signature, and (C) statistical plan

## Instruction of 'PowerPredictiveBiomarker' R package

1. Installation: In command window of R studio, perform these commands:  
if (!require("devtools"))  
  install.packages("devtools")  
devtools::install\_github("dungtsa/PowerPredictiveBiomarker",force = TRUE)
2. Get started (in command window of R studio):  
require("PowerPredictiveBiomarker")  
PowerPredictiveBiomarker.shiny()

# Supplementary Figure 1A: Parameter settings for prospective study

Statistical Power Calculation for Predictive Biomarker

Prospective Study: Statistical Power Calculation for Predictive Biomarker    Retrospective Study: Statistical Power Calculation for Predictive Biomarker

**Sample size**  
200

**Median survival time (MST) in control group with negative biomarker**  
10.11

**Median survival time (MST) in control group with positive biomarker**  
3.1

**Median survival time (MST) in treatment group with negative biomarker**  
6.66

**Median survival time (MST) in treatment group with positive biomarker**  
11.01

**Type I error**  
0.05

**Percentage of treatment**  
0.5

**prevalance of positive biomarker in treatment group**  
0.5

**prevalance of positive biomarker in control group**  
0.5

**Time unit**  
years

**Follow up time**  
2

**Total time of study**  
5

Calculate    Download

## Sample Size Justification

Table 1A: Subgroup Median Survival Time (MST)

Table 1B: Overall Median Survival Time (MST)

Table 2: Subgroup Proportion

Table 3: Subgroup Sample Size

Table 4: Subgroup Censoring Rate

Table 5: Power

Reference

## Supplementary Figure 1B: Result output for prospective study

### Statistical Power Calculation for Predictive Biomarker

Prospective Study: Statistical Power Calculation for Predictive Biomarker

Retrospective Study: Statistical Power Calculation for Predictive Biomarker

#### Sample size

200

#### Median survival time (MST) in control group with negative biomarker

10.11

#### Median survival time (MST) in control group with positive biomarker

3.1

#### Median survival time (MST) in treatment group with negative biomarker

6.66

#### Median survival time (MST) in treatment group with positive biomarker

11.01

#### Type I error

0.05

#### Percentage of treatment

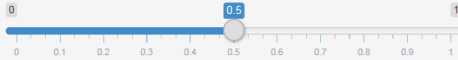

#### prevalence of positive biomarker in treatment group

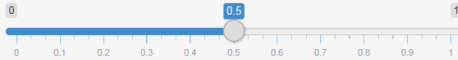

#### prevalence of positive biomarker in control group

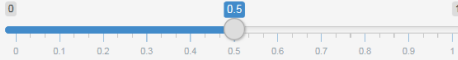

#### Time unit

years

#### Follow up time

2

#### Total time of study

5

Calculate

Download

### Sample Size Justification

We plan to use a total sample size of 200 to validate the predictive effect of the biomarker. Justification of the sample size is based on the statistical interaction model with a biomarker variable (positive and negative), a treatment variable (treatment and control), and the interaction term of the two variables in the Cox proportional hazard model:  $\lambda(t) = \lambda_0(t) \times \exp(\beta_1 \times \text{biomarker} + \beta_2 \times \text{treatment} + \beta_3 \times \text{biomarker} \times \text{treatment})$  where  $\lambda(t)$  is a hazard at time  $t$  and  $\lambda_0(t)$  is the baseline hazard. The goal is to test  $H_0: \beta_3 = 0$  where  $\beta_3$  can be expressed as the log scale of hazard ratio's ratio (HRR; described later). The methodology we used is from Peterson and Lachin methods (ref 1 and 2). Below is the justification of the sample size. We assume the median survival time (MST) is 11.01 and 3.1 years in the treatment and control groups, respectively, for patients with high (or positive) biomarker. The corresponding hazard ratio (HR) is 0.28. For patients with the low (or negative) biomarker, we assume their MSTs are 6.66 and 10.11 years in the treatment and control groups, respectively. The corresponding HR is 1.52. Therefore, the hazard ratio's ratio (HRR) of high versus low biomarker is 0.19. Table 1A summarizes the MST for each subgroup. In addition, the overall MST (combination of the 4 subgroups) is also obtained as 6.98 years accordingly (Table 1B). Similarly, MSTs for the treatment, control, positive, and negative groups are 8.56, 5.60, 5.84, 8.21 years, respectively. We also assume that (1) the percentage of patients in the treatment group is 50%, and (2) the prevalence of high biomarker is 50% and 50% in the treatment and control groups, respectively. With both assumptions, the subgroup proportion ranges 25% to 25% (Table 2). The sample size of subgroup is between 50 and 50 (Table 3). Total time of the study will be 5 years with 2 years of follow-up. Under the assumption of uniform distribution for the censoring time, the censoring time follows a uniform distribution between 2 and 5 years. By comparing with MST in Table 1A (assuming exponential distribution for survival time), we are able to calculate subgroup censoring rate. Table 4 lists censoring rate for each subgroup, ranging from 0.47 to 0.8. By taking all together for consideration with a two-sided 5% type I error, the sample size of 200 will have 87% power to detect a HRR of 0.19.

Table 1A: Subgroup Median Survival Time (MST)

|          | Control | Treatment | HR   | HRR  |
|----------|---------|-----------|------|------|
| Negative | 10.11   | 6.66      | 1.52 | 0.19 |
| Positive | 3.10    | 11.01     | 0.28 |      |

Table 1B: Overall Median Survival Time (MST)

|           | MST  |
|-----------|------|
| overall   | 6.98 |
| treatment | 8.56 |
| control   | 5.60 |
| positive  | 5.84 |
| negative  | 8.21 |

Table 2: Subgroup Proportion

|          | Control | Treatment |
|----------|---------|-----------|
| Negative | 0.25    | 0.25      |
| Positive | 0.25    | 0.25      |

Table 3: Subgroup Sample Size

|          | Control | Treatment |
|----------|---------|-----------|
| Negative | 50.00   | 50.00     |
| Positive | 50.00   | 50.00     |

Table 4: Subgroup Censoring Rate

|          | Control | Treatment |
|----------|---------|-----------|
| Negative | 0.79    | 0.70      |
| Positive | 0.47    | 0.80      |

Table 5: Power

|          | Power |
|----------|-------|
| Peterson | 0.87  |
| Lachin   | 0.87  |

Statistical Power Calculation for Predictive Biomarker in Prospective Study

Chen et al.

**Sample Size Justification**

We plan to use a total sample size of 200 to validate the predictive effect of the biomarker. Justification of the sample size is based on the statistical interaction model with a biomarker variable (positive and negative), a treatment variable (treatment and control), and the interaction term of the two variables in the Cox proportional hazard model:  $h(t) = h_0(t) \times \exp(\beta_1 \times biomarker + \beta_2 \times treatment + \beta_3 \times biomarker \times treatment)$  where  $h(t)$  is a hazard at time  $t$  and  $h_0(t)$  is the baseline hazard. The goal is to test  $H_0: \beta_3 = 0$  where  $\beta_3$  can be expressed as the log scale of hazard ratio's ratio (HRR; described later). The methodology we used is from Peterson and Lachin methods (ref 1 and 2). Below is the justification of the sample size.

We assume the median survival time (MST) is 11.01 and 3.1 years in the treatment and control groups, respectively, for patients with high (or positive) biomarker. The corresponding hazard ratio (HR) is 0.28. For patients with the low (or negative) biomarker, we assume their MSTs are 6.66 and 10.11 years in the treatment and control groups, respectively. The corresponding HR is 1.52. Therefore, the hazard ratio's ratio (HRR) of high versus low biomarker is 0.19. Table 1A summarizes the MST for each subgroup. In addition, the overall MST (combination of the 4 subgroups) is also obtained as 6.98 years accordingly (Table 1B). Similarly, MSTs for the treatment, control, positive, and negative groups are 8.56, 5.6, 5.84, 8.21 years, respectively.

We also assume that (1) the percentage of patients in the treatment group is 50%, and (2) the prevalence of high biomarker is 50% and 50% in the treatment and control groups, respectively. With both assumptions, the subgroup proportion ranges 25% to 25% (Table 2). The sample size of subgroup is between 50 and 50 (Table 3).

Total time of the study will be 5 years with 2 years of follow-up. Under the assumption of uniform distribution for the censoring time, the censoring time follows a uniform distribution between 2 and 5 years. By comparing with MST in Table 1A (assuming exponential distribution for survival time), we are able to calculate subgroup censoring rate. Table 4 lists censoring rate for each subgroup, ranging from 0.47 to 0.8.

By taking all together for consideration with a two-sided 5% type I error, the sample size of 200 will have 87% power to detect a HRR of 0.19.

**Table 1A: Subgroup MSTs**

|          | Control | Treatment | HR   | HRR  |
|----------|---------|-----------|------|------|
| Negative | 10.11   | 6.66      | 1.52 | 0.19 |
| Positive | 3.10    | 11.01     | 0.28 | NA   |

**Table 1B: Subgroup MSTs**

|           | MST  |
|-----------|------|
| overall   | 6.98 |
| treatment | 8.56 |
| control   | 5.60 |
| positive  | 5.84 |
| negative  | 8.21 |

**Table 2: Subgroup Proportions**

|          | Control | Treatment |
|----------|---------|-----------|
| Negative | 0.25    | 0.25      |
| Positive | 0.25    | 0.25      |

**Table 3: Subgroup Sample Size**

|          | Control | Treatment |
|----------|---------|-----------|
| Negative | 50      | 50        |
| Positive | 50      | 50        |

**Table 4: Subgroup Censoring Rate**

|          | Control | Treatment |
|----------|---------|-----------|
| Negative | 0.79    | 0.7       |
| Positive | 0.47    | 0.8       |

**Table 5: Statistical Power**

|          | Power |
|----------|-------|
| Peterson | 0.87  |
| Lachin   | 0.87  |

**References**

1. Peterson, B. and S.L. George, Sample size requirements and length of study for testing interaction in a 2 x k factorial design when time-to-failure is the outcome [corrected]. *Control Clin Trials*, 1993. 14(6): p. 511-22.
2. Lachin, J.M., Sample size and power for a logrank test and Cox proportional hazards model with multiple groups and strata, or a quantitative covariate with multiple strata. *Stat Med*, 2013. 32(25): p. 4413-25.

# Supplementary Figure 2A: Parameter settings for retrospective study

The screenshot shows a web browser window with the URL <http://127.0.0.1:3100/> and a tab titled "Statistical Power Calcula...". The browser's address bar and menu bar are visible at the top. The main content area is titled "Statistical Power Calculaiton for Predictive Biomarker" (note the typo in the original image). Below the title, there are two tabs: "Prospective Study: Statistical Power Calculaiton for Predictive Biomarker" and "Retrospective Study: Statistical Power Calculaiton for Predictive Biomarker". The "Retrospective Study" tab is active.

The interface is divided into two main sections: "Sample Size Justification" on the left and a list of tables on the right.

**Sample Size Justification**

**Sample size**  
135

**Type I error**  
0.05

**Time unit**  
years

**Preliminary Data: Median survival time (MST) in control group with negative biomarker**  
10.11

**Preliminary Data: Median survival time (MST) in control group with positive biomarker**  
3.1

**Preliminary Data: Median survival time (MST) in treatment group with negative biomarker**  
6.66

**Preliminary Data: Median survival time (MST) in treatment group with positive biomarker**  
11.01

**Type of Available MST and Censoring Information**  
Treatment and Control

**Stud cohort: Overall Median survival time (if choose 'Overall')**  
Stud cohort: Overall Median survival time (if choose 'Overall')

**Overall censoring rate (if choose 'Overall')**

**Stud cohort: Median survival time (MST) in Control group (if choose 'treatment and control')**  
4.82

**Stud cohort: Median survival time (MST) in Treatment group (if choose 'treatment and control')**  
7.8

**Censoring rate in Control group (if choose 'treatment and control')**  
0.55

**Censoring rate in Treatment (if choose 'treatment and control')**  
0.64

**Percentage of tretament**  
0.48

**prevalance of positive biomarker in treatment group**  
0.5

**prevalance of positive biomarker in control group**  
0.5

Buttons: Calculate, Download

**Sample Size Justification**

Table 1A: Subgroup Median Survival Time (Raw)

Table 1B: Overall Median Survival Time (Raw)

Table 1C: Subgroup Median Survival Time (Scaled)

Table 1D: Overall Median Survival Time (Scaled)

Table 2: Subgroup Proportion

Table 3: Subgroup Sample Size

Table 4: Subgroup Censoring Rate

Table 5: Power

Reference

# Supplementary Figure 2B: Result output for retrospective study Statistical Power Calculation for Predictive Biomarker

Prospective Study: Statistical Power Calculation for Predictive Biomarker

Retrospective Study: Statistical Power Calculation for Predictive Biomarker

**Sample size**  
135

**Type I error**  
0.05

**Time unit**  
years

**Preliminary Data: Median survival time (MST) in control group with negative biomarker**  
10.11

**Preliminary Data: Median survival time (MST) in control group with positive biomarker**  
3.1

**Preliminary Data: Median survival time (MST) in treatment group with negative biomarker**  
6.66

**Preliminary Data: Median survival time (MST) in treatment group with positive biomarker**  
11.01

**Type of Available MST and Censoring Information**  
Treatment and Control

**Stud cohort: Overall Median survival time (if choose 'Overall')**

**Overall censoring rate (if choose 'Overall')**

**Stud cohort: Median survival time (MST) in Control group (if choose 'treatment and control')**  
0.5

**prevalence of positive biomarker in control group**  
0.5

## Sample Size Justification

We plan to use a total sample size of 135 to validate the predictive effect of the biomarker. Justification of the sample size is based on the statistical interaction model with a biomarker variable (positive and negative), a treatment variable (treatment and control), and the interaction term of the two variables in the Cox proportional hazard model:  $\lambda(t) = \lambda_0(t) \times \exp(\beta_1 \times \text{biomarker} + \beta_2 \times \text{treatment} + \beta_3 \times \text{biomarker} \times \text{treatment})$  where  $\lambda(t)$  is a hazard at time  $t$  and  $\lambda_0(t)$  is the baseline hazard. The goal is to test  $H_0: \beta_3 = 0$  where  $\beta_3$  can be expressed as the log scale of hazard ratio's ratio (HRR, described below). The methodology we used is from Peterson and Lachin methods (ref 1 and 2). Below is the justification of the sample size. Our preliminary data indicate the biomarker is able to detect an HRR of 0.19 (effect size) with a hazard ratio (HR) of 0.28 in the positive biomarker (11.01 and 3.1 years in the treatment and control groups, respectively) and a HR of 1.52 in the negative biomarker (6.66 and 10.11 years in the treatment and control groups, respectively) in Table 1A. The overall MST (combination of the 4 subgroups) is 6.92 years accordingly (Table 1B). Similarly, MSTs for the treatment and control groups are 8.56 and 5.6 years respectively. To apply the preliminary data to the study cohort to testing the effect size (HRR= 0.19) for the predictive biomarker, we compare MST of the treatment (and control) between the preliminary data and the study cohort. Results show that for the treatment group, the preliminary data had a higher MST than the study cohort (8.56 vs 7.8 years). For the control group, the preliminary data had a higher MST than the study cohort (5.6 vs 4.82 years). To make both data comparable, we rescale the preliminary data with a scale factor of 0.91 and 0.86 for the treatment and control, respectively. As a result, MSTs in treatment and control from Table 1 (after rescale; Table 1C) match well to the ones in the study cohort while retaining the same HRR. We also assume that (1) the percentage of patients in the treatment group is 48%, and (2) the prevalence of positive biomarker is 50% and 50% in the treatment and control groups, respectively. With both assumptions, the subgroup proportion ranges 24% to 26% (Table 2). The sample size of subgroup is between 32 and 35 (Table 3). Since the study cohort has a censoring rate of 0.64 and 0.55 for the treatment and control, respectively, in order to match the same censoring rates for Table 1C, the exponential distribution with MST of 13.98 and 5.99 was used for the censoring time in the treatment and control groups, respectively. Table 4 lists censoring rate for each subgroup, ranging from 0.41 to 0.7. By taking all together for consideration with a two-sided 5% type I error, the sample size of 135 will have 85% power to detect a HRR of 0.19.

Table 1A: Subgroup Median Survival Time (Raw)

|        | Control | Treatment | HR   | HRR  |
|--------|---------|-----------|------|------|
| C_low  | 10.11   | 6.66      | 1.52 | 0.19 |
| C_high | 3.10    | 11.01     | 0.28 |      |

Table 1B: Overall Median Survival Time (Raw)

|           | MST  |
|-----------|------|
| overall   | 6.92 |
| treatment | 8.56 |
| control   | 5.60 |

Table 1C: Subgroup Median Survival Time (Scaled)

|       | Control | Treatment | HR   | HRR  |
|-------|---------|-----------|------|------|
| C_low | 8.69    | 6.06      | 1.43 | 0.19 |

Table 3: Subgroup Sample Size

|          | Control | Treatment |
|----------|---------|-----------|
| Negative | 35.00   | 32.00     |
| Positive | 35.00   | 32.00     |

Table 4: Subgroup Censoring Rate

|          | Control | Treatment |
|----------|---------|-----------|
| Negative | 0.41    | 0.70      |
| Positive | 0.69    | 0.58      |

Table 5: Power

|          | Power |
|----------|-------|
| Peterson | 0.85  |
| Lachin   | 0.85  |

## Statistical Power Calculation for Predictive Biomarker in Retrospective Study

Chen et al.

---

### Sample Size Justification

We plan to use a total sample size of 135 to validate the predictive effect of the biomarker. Justification of the sample size is based on the statistical interaction model with a biomarker variable (positive and negative), a treatment variable (treatment and control), and the interaction term of the two variables in the Cox proportional hazard model:  $h(t) = h_0(t) \times \exp(\beta_1 \times \text{biomarker} + \beta_2 \times \text{treatment} + \beta_3 \times \text{biomarker} \times \text{treatment})$  where  $h(t)$  is a hazard at time  $t$  and  $h_0(t)$  is the baseline hazard. The goal is to test  $H_0: \beta_3 = 0$  where  $\beta_3$  can be expressed as the log scale of hazard ratio's ratio (HRR; described below). The methodology we used is from Peterson and Lachin methods (ref 1 and 2). Below is the justification of the sample size.

Our preliminary data indicate the biomarker is able to detect an HRR of 0.19 (effect size) with a hazard ratio (HR) of 0.28 in the positive biomarker (11.01 and 3.1 years in the treatment and control groups, respectively) and a HR of 1.52 in the negative biomarker (6.66 and 10.11 years in the treatment and control groups, respectively) in Table 1A. The overall MST (combination of the 4 subgroups) is 6.92 years accordingly (Table 1B). Similarly, MSTs for the treatment and control groups are 8.56 and 5.6 years respectively.

To apply the preliminary data to the study cohort to testing the effect size (HRR= 0.19) for the predictive biomarker, we compare MST of the treatment (and control) between the preliminary data and the study cohort. Results show that for the treatment group, the preliminary data had a higher MST than the study cohort (8.56 vs 7.8 years). For the control group, the preliminary data had a higher MST than the study cohort (5.6 vs 4.82 years). To make both data comparable, we rescale the preliminary data with a scale factor of 0.91 and 0.86 for the treatment and control, respectively. As a result, MSTs in treatment and control from Table 1 (after rescale; Table 1C) match well to the ones in the study cohort while retaining the same HRR.

We also assume that (1) the percentage of patients in the treatment group is 48%, and (2) the prevalence of positive biomarker is 50% and 50% in the treatment and control groups, respectively. With both assumptions, the subgroup proportion ranges 24% to 26% (Table 2). The sample size of subgroup is between 32 and 35 (Table 3).

Since the study cohort has a censoring rate of 0.64 and 0.55 for the treatment and control, respectively, in order to match the same censoring rates for Table 1C, the exponential distribution with MST of 13.98 and 5.99 was used for the censoring time in the treatment and control groups, respectively. Table 4 lists censoring rate for each subgroup, ranging from 0.41 to 0.7

By taking all together for consideration with a two-sided 5% type I error, the sample size of 135 will have 85% power to detect a HRR of 0.19.



**Table 1A: Subgroup Median Survival Time (Raw)**

|        | Control | Treatment | HR   | HRR  |
|--------|---------|-----------|------|------|
| C_low  | 10.11   | 6.66      | 1.52 | 0.19 |
| C_high | 3.10    | 11.01     | 0.28 | NA   |

**Table 1B: Overall Median Survival Time (Raw)**

|           | MST  |
|-----------|------|
| overall   | 6.92 |
| treatment | 8.56 |
| control   | 5.60 |

**Table 1C: Subgroup Median Survival Time (Scaled)**

|        | Control | Treatment | HR   | HRR  |
|--------|---------|-----------|------|------|
| C_low  | 8.6946  | 6.0606    | 1.43 | 0.19 |
| C_high | 2.6660  | 10.0191   | 0.27 | NA   |

**Table 1D: Overall Median Survival Time (Scaled)**

|           | MST   |
|-----------|-------|
| overall   | 6.116 |
| treatment | 7.796 |
| control   | 4.816 |

**Table 2: Subgroup Proportions**

|          | Control | Treatment |
|----------|---------|-----------|
| Negative | 0.26    | 0.24      |
| Positive | 0.26    | 0.24      |

**Table 3: Subgroup Sample Size**

|          | Control | Treatment |
|----------|---------|-----------|
| Negative | 35      | 32        |
| Positive | 35      | 32        |

**Table 4: Subgroup Censoring Rate**

|  | Control | Treatment |
|--|---------|-----------|
|--|---------|-----------|

|          |      |      |
|----------|------|------|
| Negative | 0.41 | 0.70 |
| Positive | 0.69 | 0.58 |

**Table 5: Statistical Power**

|          | Power |
|----------|-------|
| Peterson | 0.85  |
| Lachin   | 0.85  |

### References

1. Peterson, B. and S.L. George, Sample size requirements and length of study for testing interaction in a 2 x k factorial design when time-to-failure is the outcome [corrected]. *Control Clin Trials*, 1993. 14(6): p. 511-22.
2. Lachin, J.M., Sample size and power for a logrank test and Cox proportional hazards model with multiple groups and strata, or a quantitative covariate with multiple strata. *Stat Med*, 2013. 32(25): p. 4413-25.
